# Supplementary material for: Tuning the band gap and polarization of BaSnO3/SrSnO3 superlattices for photovoltaic applications
Source: Royal Society of Chemistry journal article supplement (doi:10.1039/c6cp06042k), 2017-01-01
Supplement: c6cp06042k1.pdf [file c6cp06042k1.pdf]

## Supplementary Materials

### Tuning the band gap and polarization in BaSnO<sub>3</sub>/SrSnO<sub>3</sub> superlattices for photovoltaic applications

Yajun Zhang<sup>1</sup>, MPK Sahoo<sup>1,2,3</sup>, Jie Wang<sup>1,2\*</sup> □

<sup>1</sup>Department of Engineering Mechanics, School of Aeronautics and Astronautics,  
Zhejiang University, 38 Zheda Road, Hangzhou 310007, China

<sup>2</sup>Key Laboratory of Soft Machines and Smart Devices of Zhejiang Province, Zhejiang  
University, 38 Zheda Road, Hangzhou 310007, China

<sup>3</sup>Department of Physics, RGUKT IIT, Nuzvid Campus, Andhra Pradesh, India

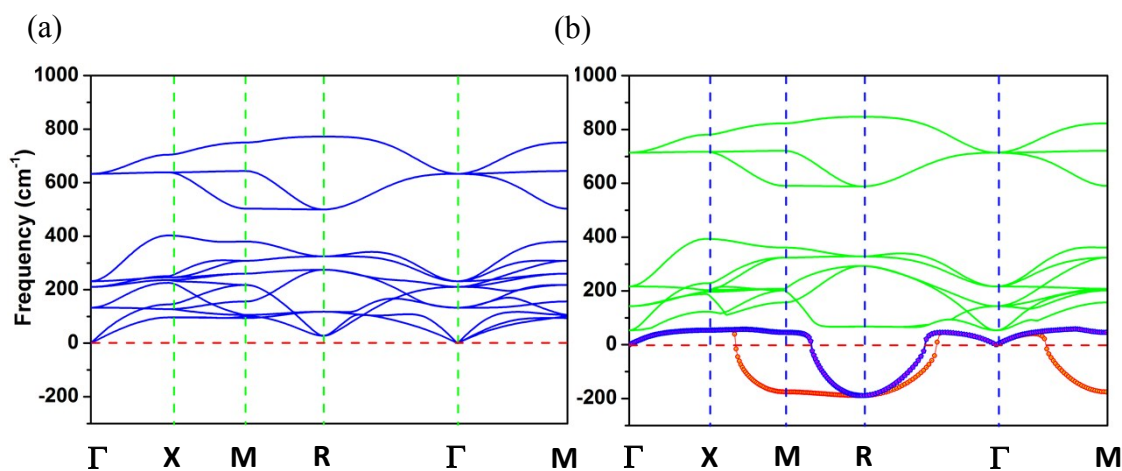

Fig. S1 Phonon dispersion curves of cubic phase for (a) BaSnO<sub>3</sub> and (b) SrSnO<sub>3</sub>. The imaginary frequencies (unstable modes) are depicted as negative values.

\* E-mail: jw@zju.edu.cn

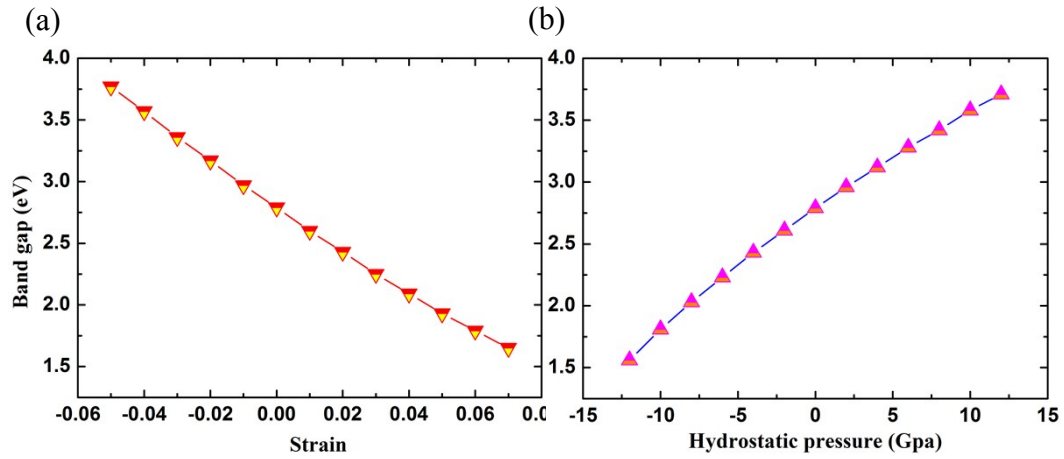

Fig. S2 The calculated band gap for cubic BaSnO<sub>3</sub> as a function of (a) biaxial strain and (b) hydrostatic pressure.

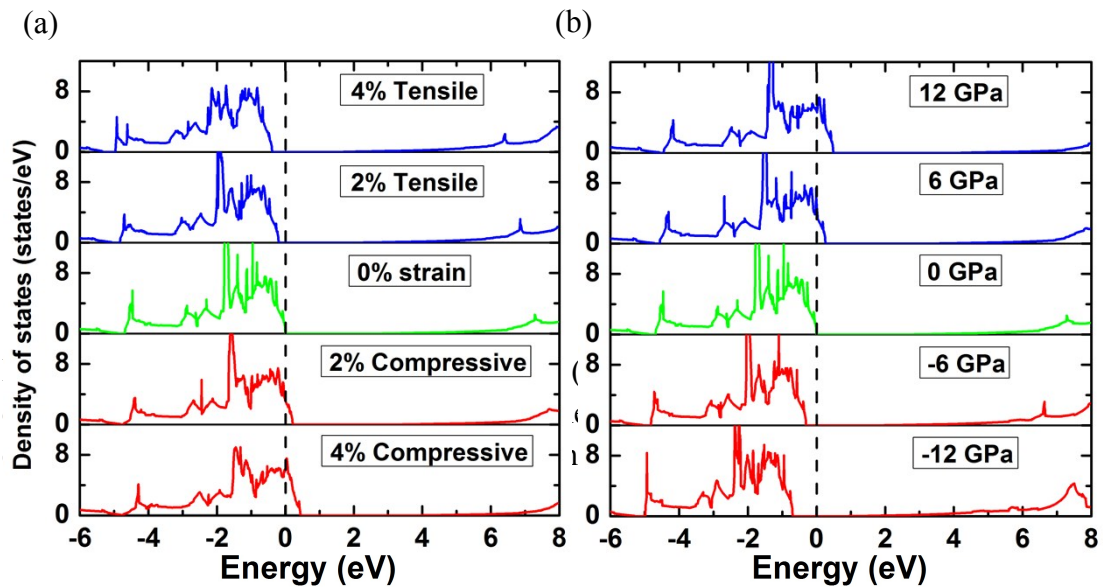

Fig. S3 Total density of states of cubic BaSnO<sub>3</sub>, (a) under different biaxial strains and (b) under different hydrostatic pressure. The Fermi level is set to zero.
